# Supplementary material
Source: publisher figshare collection journal article supplement (https://rs.figshare.com/ndownloader/files/20939751)

**Supplementary Material 1:** Images of public greenspace that contain SuDS (sustainable drainage systems) that were shown to respondents before they completed the feeling thermometers and IAT (Implicit Association Test). These images were also used as target-concepts (SuDS) in the IATs.

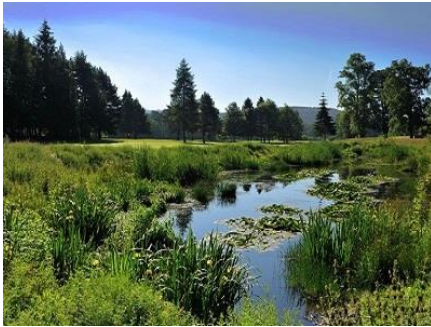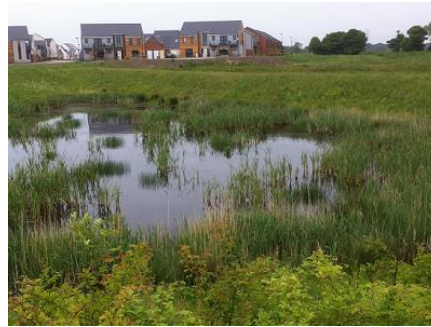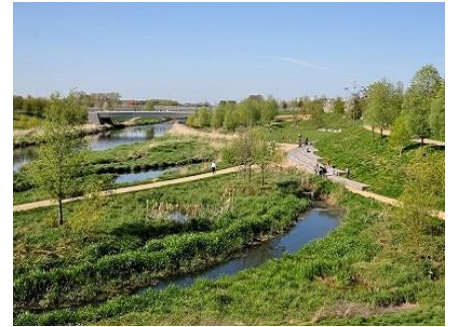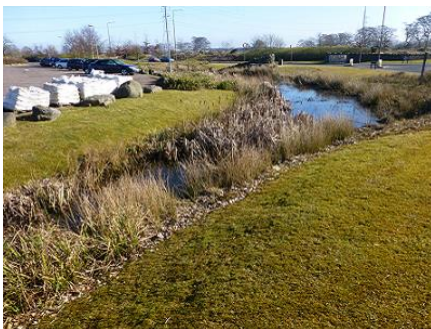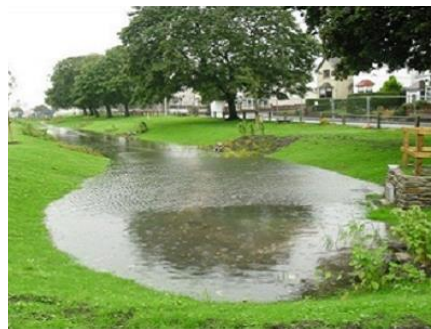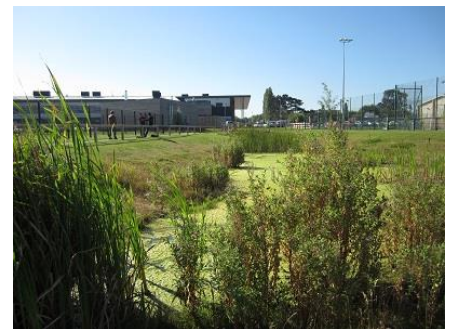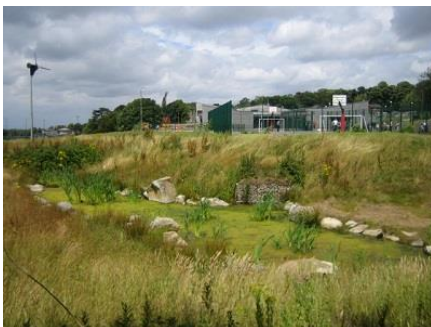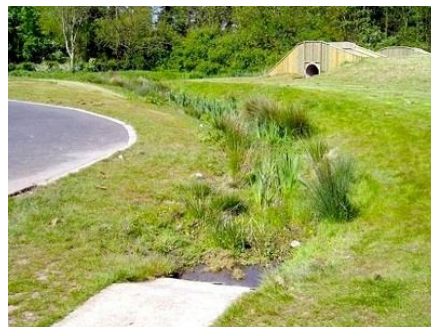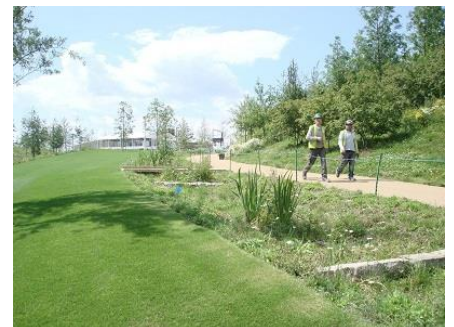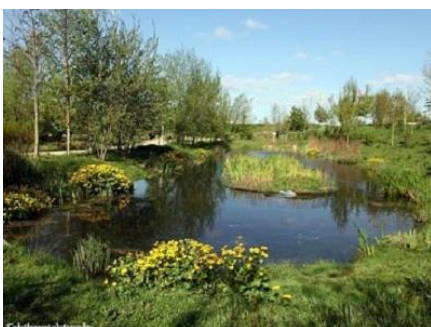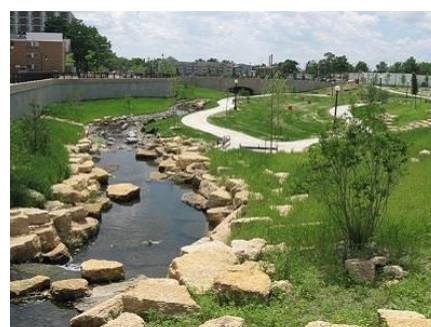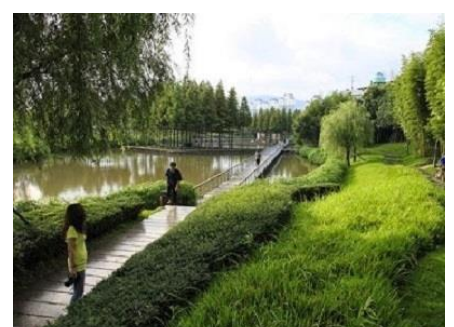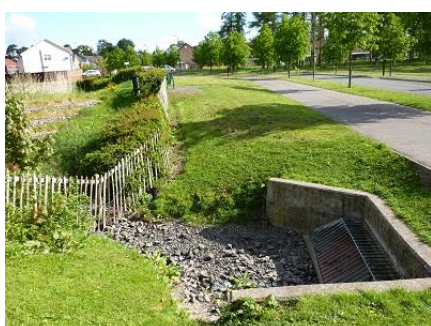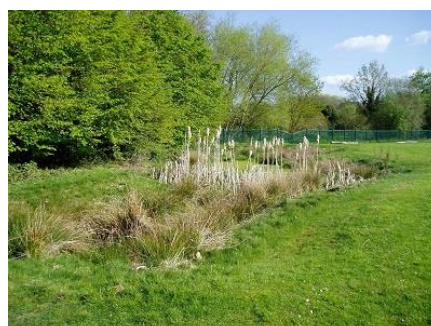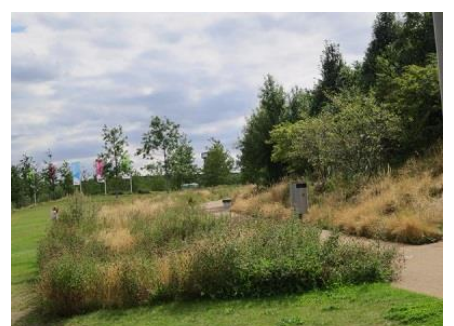

Supplement: Supplementary file [file 20939751]
